# Supplementary material for: Exploring the Pivotal Components Influencing the Side Effects Induced by an Analgesic-Antitumor Peptide from Scorpion Venom on Human Voltage-Gated Sodium Channels 1.4 and 1.5 through Computational Simulation
Source: MDPI journal article supplement (doi:10.3390/toxins15010033), 2022-12-31
Supplement: s1 [file s1]

# Supplementary Materials: Exploring the Pivotal Components Influencing the Side Effects Induced by an Analgesic-Antitumor Peptide from Scorpion Venom on Human Voltage-Gated Sodium Channels 1.4 and 1.5 through Computational Simulation

Fan Zhao, Liangyi Fang, Qi Wang, Qi Ye, Yanan He, Weizhuo Xu and Yongbo Song

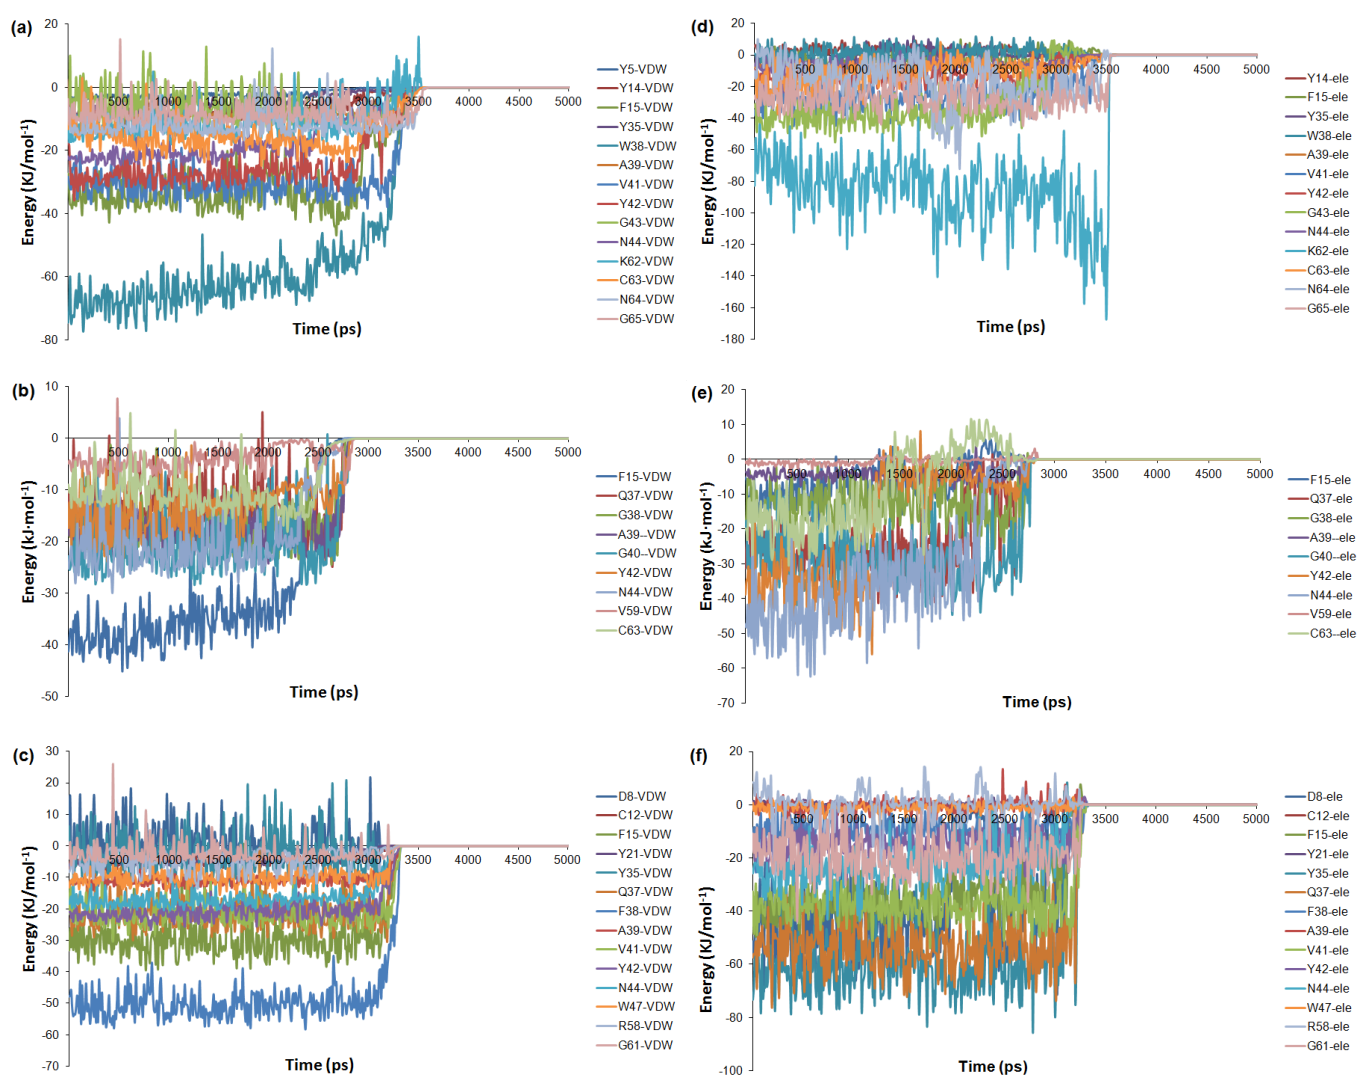

**Figure S1.** VDW interaction and electrostatic interaction of residues on AGAP and its mutants that directly contact with VSD2s on hNav1.4. (a, d) AGAP; (b, e) AGAP<sup>W38G</sup>; (c, f) AGAP<sup>W38F</sup>. Ele is short for electrostatic interaction.

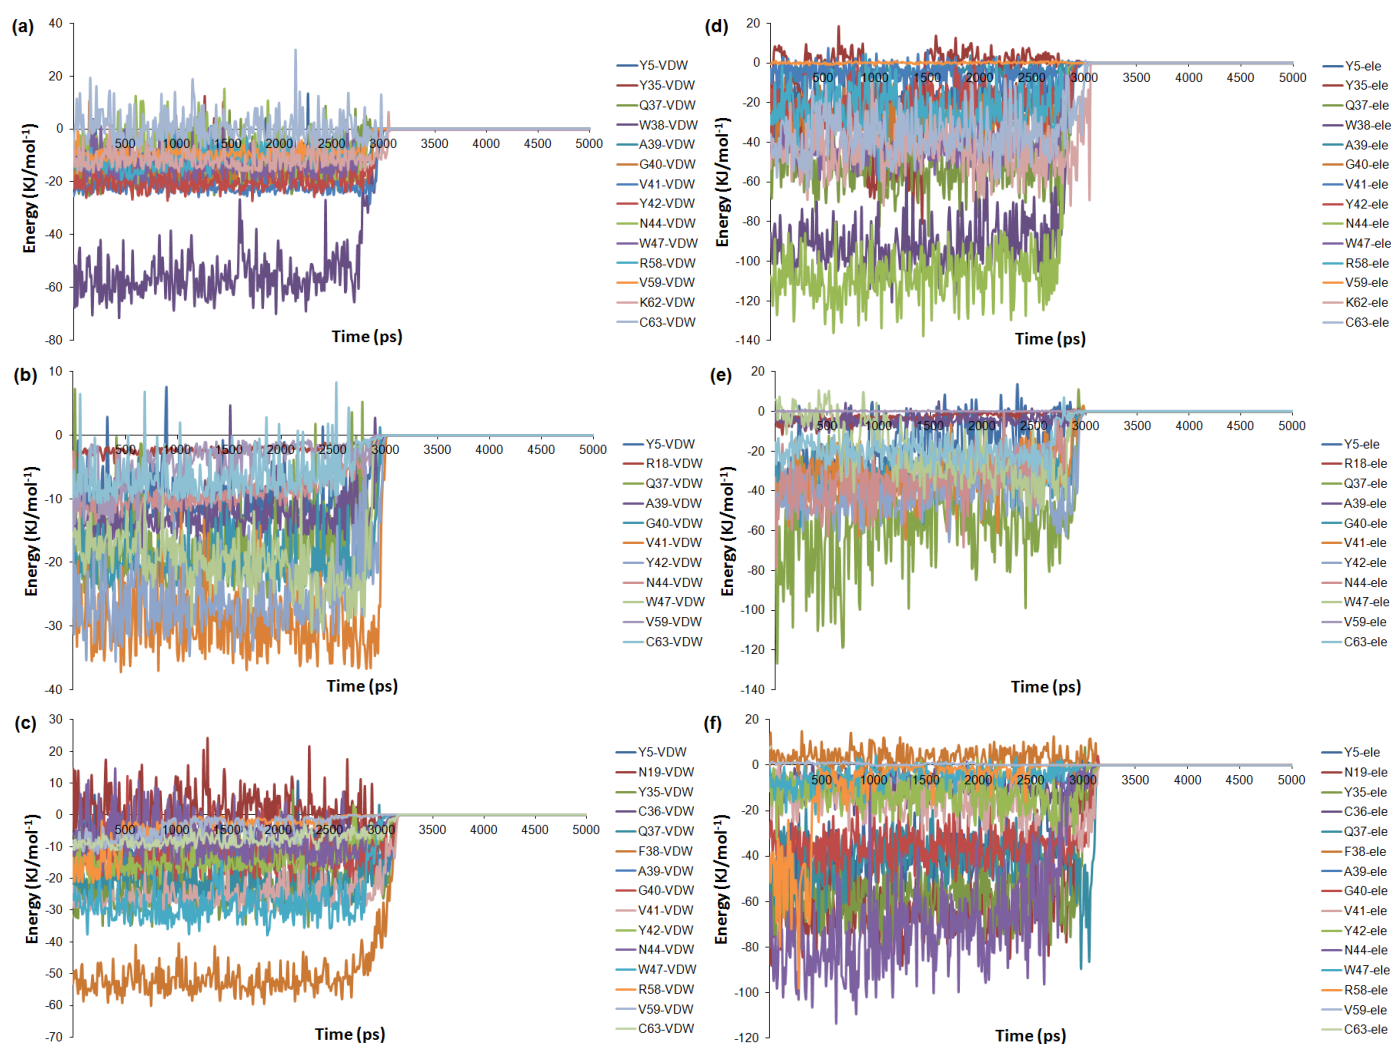

**Figure S2.** VDW interaction and electrostatic interaction of residues on AGAP and its mutants that directly contact with VSD2s on hNav1.5. (a, d) AGAP; (b, e) AGAP<sup>W38G</sup>; (c, f) AGAP<sup>W38F</sup>. Ele is short for electrostatic interaction.

**Table S1.** Residues involved in the formations of hydrogen bonds in SMD simulation of AGAP and its mutants with VSD2s on hNav1.4.

| Region on AGAP                     | Residues involed in H-bonding on AGAP | Residues involed in H-bonding on VSD2 <sup>hNav1.4</sup> |                                               |                                               |
|------------------------------------|---------------------------------------|----------------------------------------------------------|-----------------------------------------------|-----------------------------------------------|
|                                    |                                       | VSD2 <sup>hNav1.4</sup> -AGAP                            | VSD2 <sup>hNav1.4</sup> -AGAP <sup>W38G</sup> | VSD2 <sup>hNav1.4</sup> -AGAP <sup>W38F</sup> |
| β-sheet I                          | D8                                    | -                                                        | -                                             | Gln105                                        |
| loop between α-helix and β-sheet I | F15                                   | -                                                        | -                                             | Gln105                                        |
| β-sheet III                        | Y35                                   | -                                                        | -                                             | Asp49                                         |
| β-turn                             | Q37                                   | -                                                        | Met44                                         | Phe48                                         |
|                                    | W38                                   | His41                                                    | -                                             | -                                             |
|                                    | G38                                   | -                                                        | Tyr42                                         | -                                             |
|                                    | F38                                   | -                                                        | -                                             | -                                             |
|                                    | G40                                   | -                                                        | His41                                         | -                                             |
|                                    | V41                                   | Met,39, Arg111, Arg114                                   | -                                             | Arg111, Arg114                                |
|                                    | Y42                                   | -                                                        | Gln105                                        | Arg114                                        |
|                                    | G43                                   | Glu98                                                    | -                                             | -                                             |
|                                    | N44                                   | Thr53, Glu98                                             | Thr53, Asn56                                  | Glu98                                         |
| C-terminal                         | G61                                   | -                                                        | -                                             | Arg111                                        |
|                                    | K62                                   | Glu40                                                    | -                                             | -                                             |
|                                    | C63                                   | Ser108                                                   | Gln105                                        | -                                             |
|                                    | N64                                   | Ser108                                                   | -                                             | -                                             |
|                                    | G65                                   | Leu107                                                   | -                                             | -                                             |

**Table S2.** Residues involved in the formations of hydrogen bonds in SMD simulation of AGAP and its mutants with VSD2s on hNav1.5.

| Region on AGAP                     | Residues involed in H-bonding on AGAP | Residues involed in H-bonding on VSD2 <sup>hNav1.5</sup> |                                               |                                               |
|------------------------------------|---------------------------------------|----------------------------------------------------------|-----------------------------------------------|-----------------------------------------------|
|                                    |                                       | VSD2 <sup>hNav1.5</sup> -AGAP                            | VSD2 <sup>hNav1.5</sup> -AGAP <sup>W38G</sup> | VSD2 <sup>hNav1.5</sup> -AGAP <sup>W38F</sup> |
| β-sheet I                          | Y5                                    | Asn43                                                    | Asn43                                         | Asn43                                         |
| loop between α-helix and β-sheet I | N19                                   | -                                                        | -                                             | Gln53                                         |
| β-sheet III                        | Y35                                   | Glu49                                                    | -                                             | Glu50                                         |
|                                    | C36                                   | -                                                        | -                                             | Gln53                                         |
| β-turn                             | Q37                                   | Met44, Thr45                                             | Glu40, His41, Asn43                           | Gln53                                         |
|                                    | W38                                   | Glu98, Arg111                                            | -                                             | -                                             |
|                                    | G38                                   | -                                                        | -                                             | -                                             |
|                                    | F38                                   | -                                                        | -                                             | -                                             |
|                                    | G40                                   | His41                                                    | His41, Arg111                                 | His41, Arg111                                 |
|                                    | V41                                   | Asn106, Leu107                                           | Tyr42, Leu110                                 | Tyr42                                         |
|                                    | Y42                                   | Asn106, Leu107                                           | Asn106                                        | Asn106                                        |
|                                    | N44                                   | Glu98, Ser102, Met104                                    | Glu98, Ser102                                 | Glu98, Ser102                                 |
| β-sheet II                         | W47                                   | Asn43, Thr45                                             | Asn43                                         | -                                             |
| C-terminal                         | R58                                   | Asn43                                                    | -                                             | Asn43                                         |
|                                    | K62                                   | Ser108                                                   | -                                             | -                                             |
|                                    | C63                                   | Asn106                                                   | Asn106                                        | Asn106                                        |

**Table S3.** Abbreviations in the paper.

| <b>Word or Phrase</b>                                        | <b>Abbreviation</b> |
|--------------------------------------------------------------|---------------------|
| voltage-gated sodium channel                                 | VGSC                |
| $\beta$ -Scorpion Toxin                                      | $\beta$ -ScTx       |
| analgesic-antitumour peptide                                 | AGAP                |
| four homologous domains formed the $\alpha$ -subunit of VGSC | DI-DIV              |
| voltage sensing domain                                       | VSD                 |
| discrete optimized protein energy                            | DOPE                |
| molecular dynamics                                           | MD                  |
| 1-palmitoyl-2-oleoyl-sn-glycero-3-phosphocholine             | POPC                |
| particle mesh Ewald                                          | PME                 |
| root-mean-square deviation                                   | RMSD                |
| steered molecular dynamics                                   | SMD                 |
| potential of mean force                                      | PMF                 |
| wild type                                                    | WT                  |
